# Supplementary material
Source: PubMed Central journal article supplement (PMC5556394)

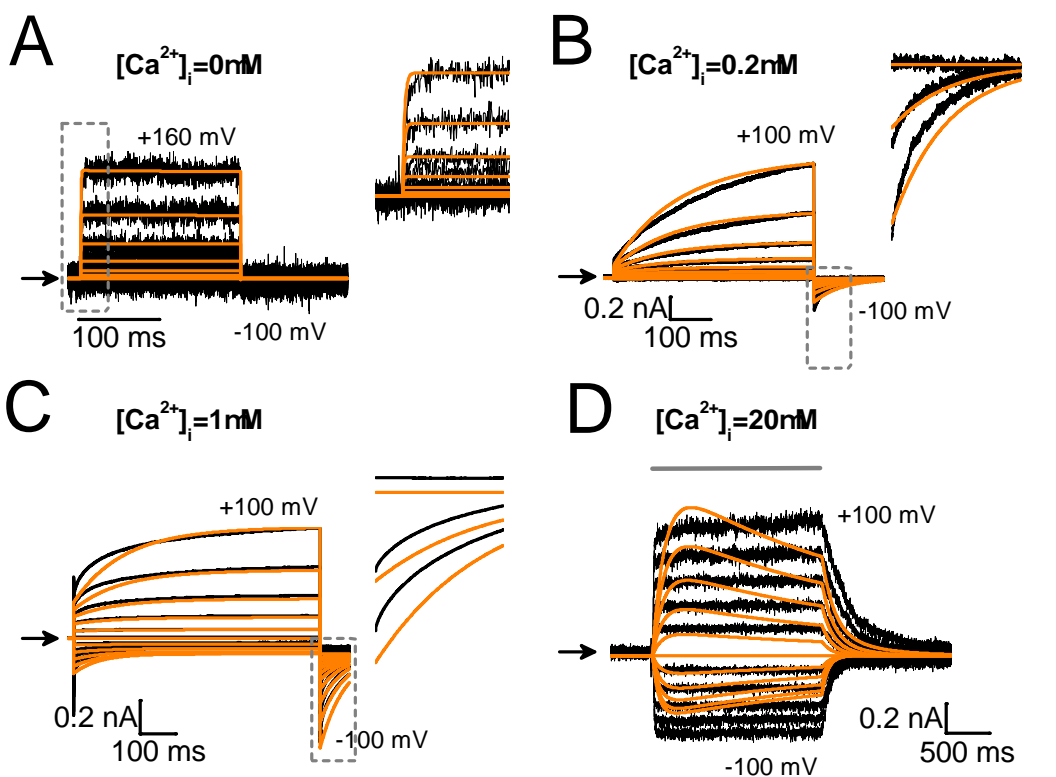

Supplement: NIHMS890585-supplement-Suppl_Fig_1.pdf [file NIHMS890585-supplement-Suppl_Fig_1.pdf]

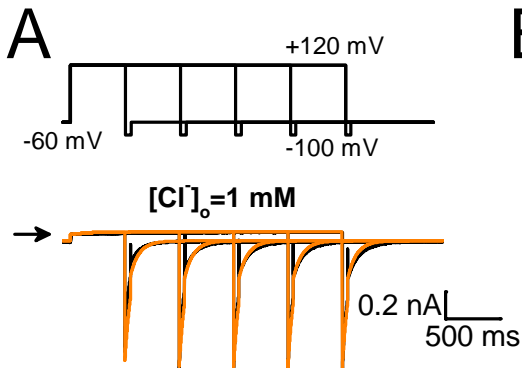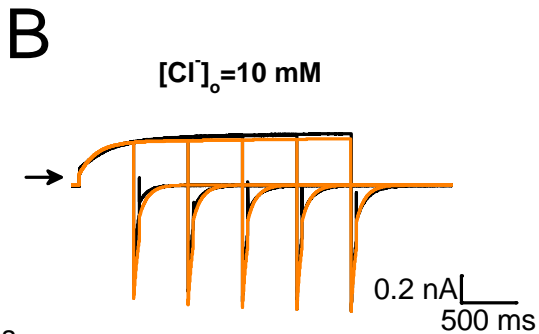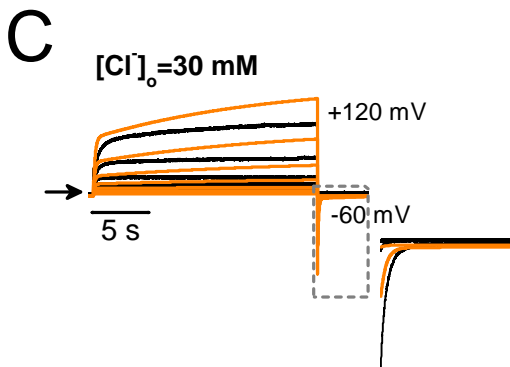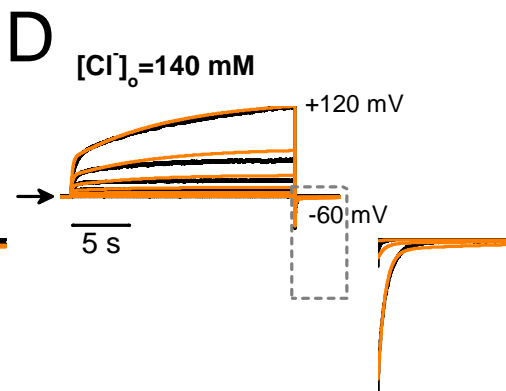

Suppl 2

Supplement: NIHMS890585-supplement-Suppl_Fig__2.pdf [file NIHMS890585-supplement-Suppl_Fig__2.pdf]
